# Supplementary material for: Text-mining-assisted biocuration workflows in Argo
Source: Oxford University Press journal article supplement (doi:10.1093/database/bau070), 2014-01-01
Supplement: bau070_Supplementary_Data.zip [file bau070_Supplementary_Data.zip]

Archive with 2 entries (2 files):
- AnnotatingMetabolicProcesses_Instructions.pdf
- AnnotatingMetabolicProcesses_Guidelines.pdf
